# Supplementary material
Source: Springer Nature journal article supplement (https://www.springermedizin.de/resource/supplementary/12890_2012_380_MOESM1_ESM.pdf/9505256)

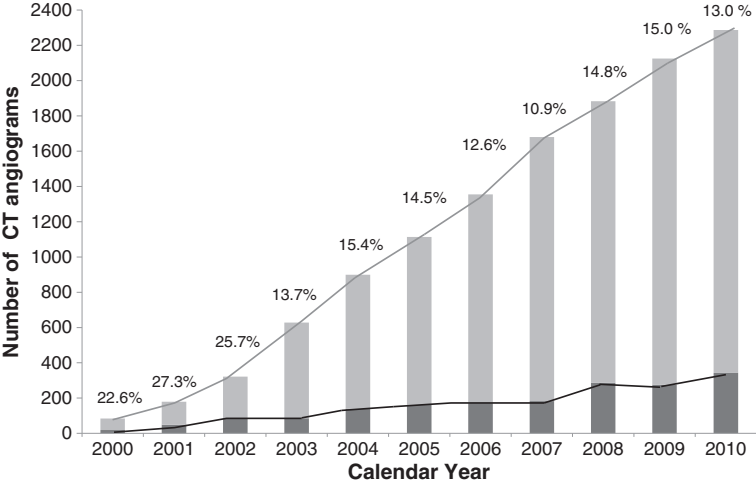

Supplement: MOESM1 [file 9505256]
